# Supplementary material
Source: publisher figshare collection journal article supplement (https://acs.figshare.com/ndownloader/files/28955395)
Supplement: Supplementary file 1 [file 28955395]

SUPPLEMENTAL INFORMATION FOR

Thin Film and Bulk Phases Co-nucleate at the

Interfaces of Pentacene Thin Films

*Thorn A. Dramstad, Zhihao Wu, Grace M. Gretz, Aaron M. Massari\**

University of Minnesota – Twin Cities, 207 Pleasant St. SE, Minneapolis, MN 55454

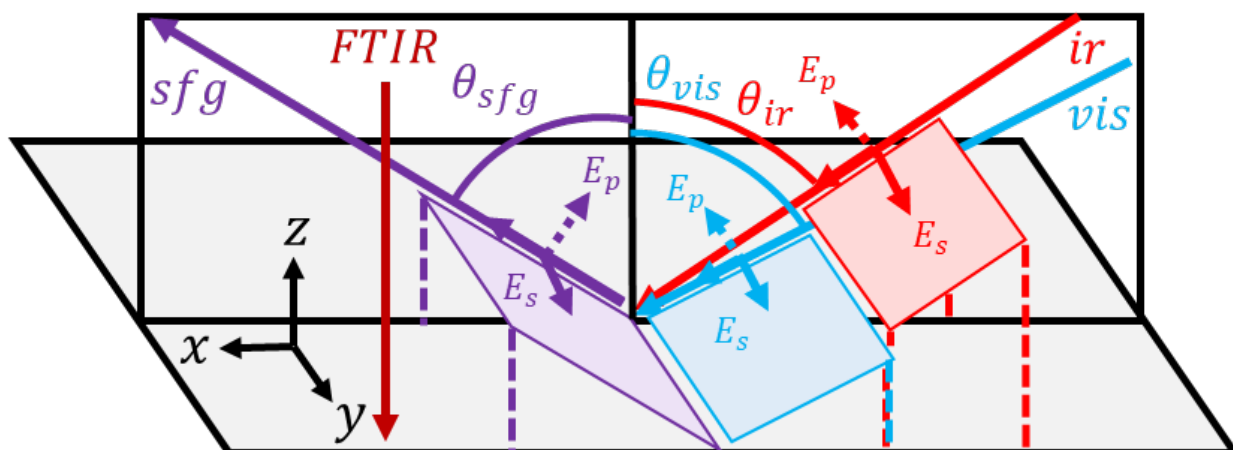

**Figure S1.** Geometry of the FTIR and VSFG experiments where the sample lies in the  $xy$  plane. The  $ssp$  experiment will probe the  $z$  direction, while the  $sps$  experiment will probe the  $y$  direction.

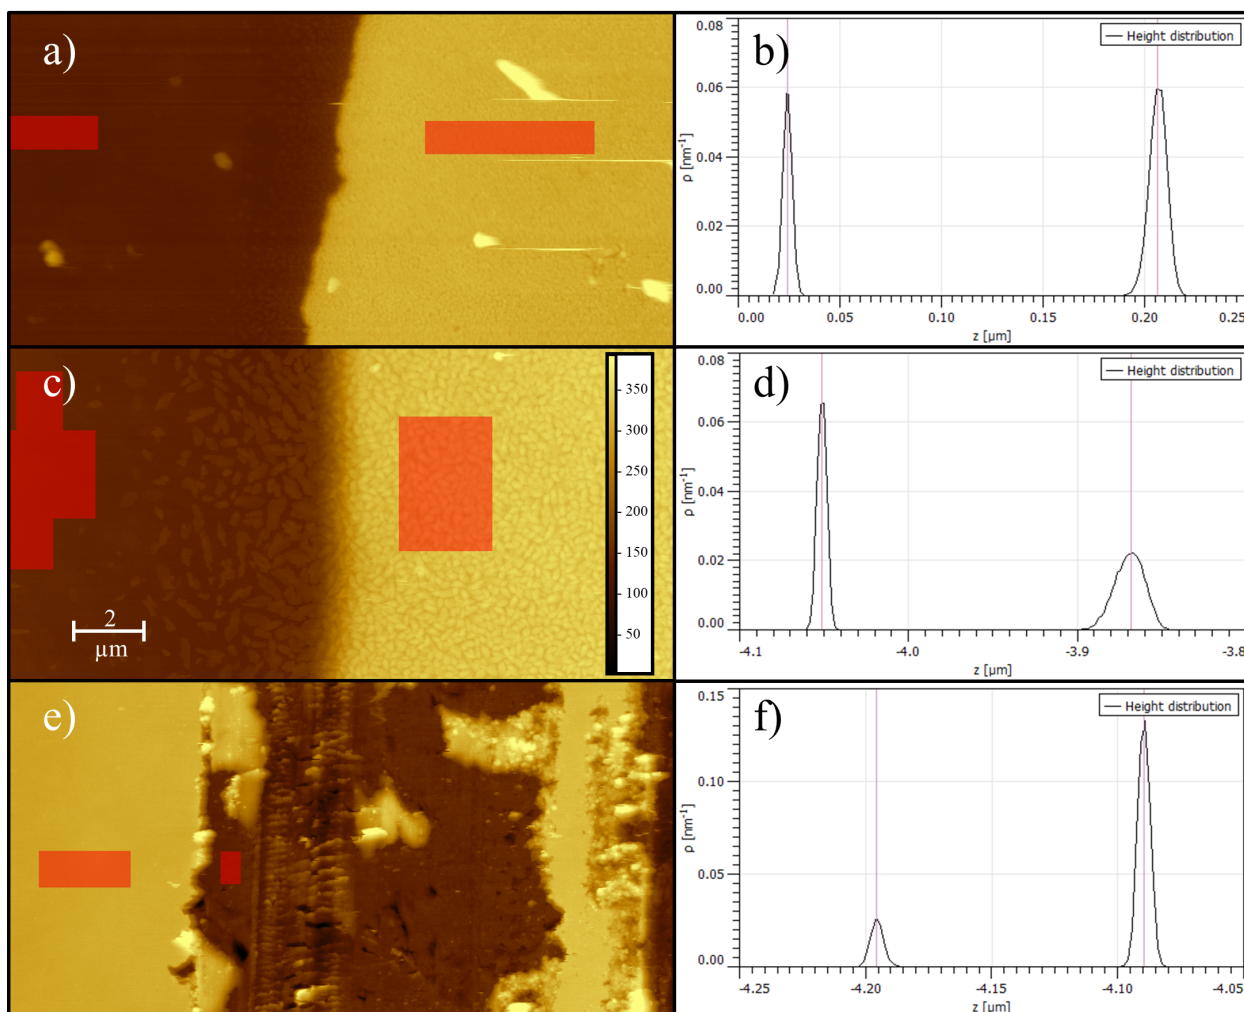

**Figure S2.** AFM topography images of samples with an QCM-measured deposition thicknesses of 200 nm with substrate temperatures of a) 28 °C, c) 125 °C (inset height scale for all images in nm), and e) 150 °C during deposition, and associated height distribution plots (b, d, f).

Using AFM we determined the height difference between the substrate and the sample to solve for the true sample thickness (Figure S2). We calculated the step differences between the red highlighted boxes to be 182, 183, and 106 nm respectively for the samples deposited at substrate temperatures of 28 °C, 125 °C, and 150 °C. Deposition will be linear, so a sample with an expected thickness of 100 nm will have half the listed values above as a true thickness.

**Table S1.** XRD measured standard deviation, amplitude, and area under each Gaussian for each (001) peak for samples on CaF<sub>2</sub> windows with different substrate temperatures during deposition.

|        | Thin-Film Phase |                |       | Bulk Phase |                |      |
|--------|-----------------|----------------|-------|------------|----------------|------|
|        | Amp.            | std. deviation | Area  | Amp.       | std. deviation | Area |
| 28 °C  | 19730           | 0.13           | 6380  | 0          | 0.00           | 0    |
| 125 °C | 27990           | 0.14           | 10018 | 7801       | 0.19           | 3752 |
| 150 °C | 324             | 0.20           | 162   | 1150       | 0.16           | 451  |
| 160 °C | 0               | 0.00           | 0     | 1081       | 0.17           | 466  |

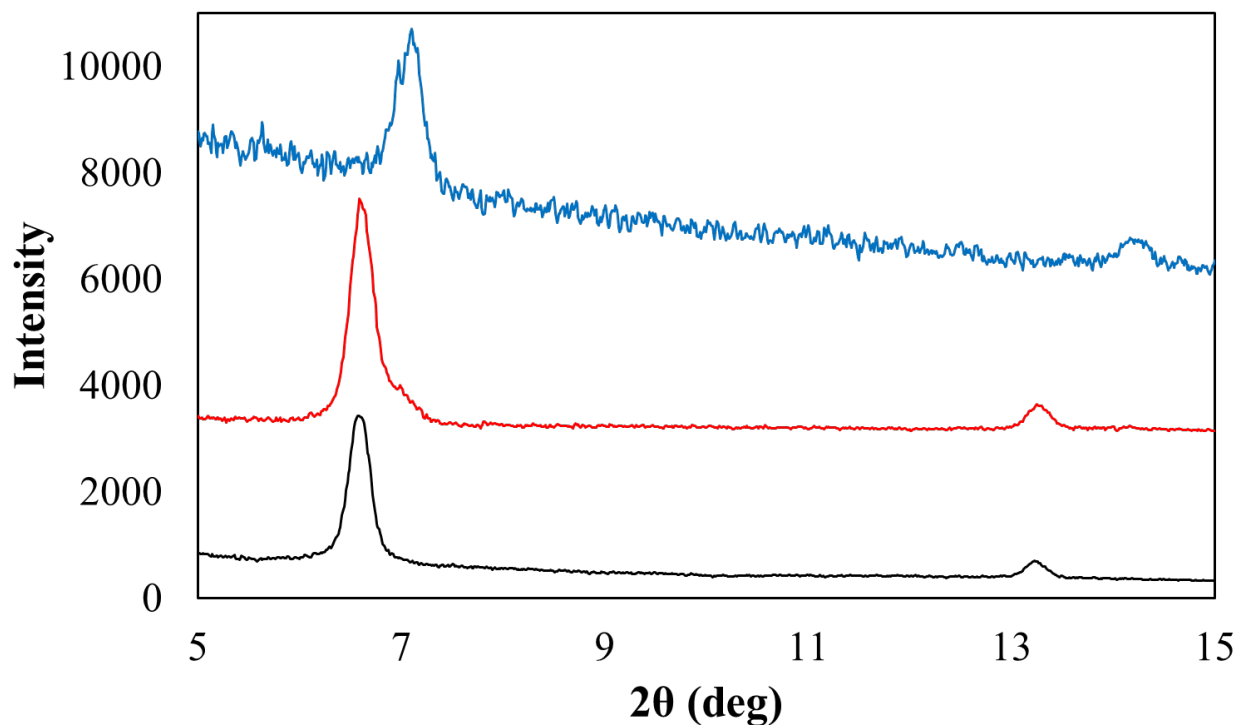

**Figure S3.** XRD measurements of pentacene deposited on SiO<sub>2</sub> wafers with substrate temperatures of 28 °C (black), 125 °C (red), and 150 °C (blue) during deposition.

**Table S2.** Experimental and theoretical frequencies of pentacene and pentacenequinone vibrational modes.

| Mode          | Pentacene                                  |                                            | Pentacenequinone                           |                                            |
|---------------|--------------------------------------------|--------------------------------------------|--------------------------------------------|--------------------------------------------|
|               | Experimental Frequency (cm <sup>-1</sup> ) | Theoretical Frequency (cm <sup>-1</sup> )* | Experimental Frequency (cm <sup>-1</sup> ) | Theoretical Frequency (cm <sup>-1</sup> )* |
| CH (z)        | 904                                        | 879.6                                      | 913                                        | 911.5                                      |
| CH (z)        |                                            |                                            | 937                                        | 938.2                                      |
| Ring str. (y) |                                            |                                            | 959                                        | 977.3                                      |
| CO (x)        |                                            |                                            | 1615                                       | 1601.7                                     |
| Ring str. (x) | 1624                                       | 1617.3                                     |                                            |                                            |
| CO (y)        |                                            |                                            | 1673                                       | 1682.3                                     |
| CH (x)        | 3013                                       | 3036.5                                     |                                            |                                            |
| CH (x)        | 3027                                       | 3040.8                                     |                                            |                                            |
| CH (x)        |                                            | 3042.5                                     |                                            |                                            |
| CH (y)        | 3042                                       | 3046.2                                     |                                            |                                            |
| CH (x)        | 3053                                       | 3059.4                                     | 3046                                       | 3063.0                                     |
| CH (y)        | 3072                                       | 3071.0                                     |                                            | 3074.2                                     |

\*A scaling factor of 0.9581 was applied.<sup>1-3</sup>

**Table S3.** FTIR measured HWHM ( $\text{cm}^{-1}$ ), amplitude ( $\times 10^3$  au), and center frequency ( $\text{cm}^{-1}$ ) for each C–H vibrational mode for samples on  $\text{CaF}_2$  windows with different substrate temperatures during deposition.

|                    |           |      | 28 °C   | 125 °C  | 150 °C  | 160 °C  |
|--------------------|-----------|------|---------|---------|---------|---------|
| Mode               | Frequency | HWHM | Amp.    | Amp.    | Amp.    | Amp.    |
| $\nu_1(\text{CH})$ | 3013.1    | 8.3  | 0.00333 | 0.00355 | 0.00269 | 0.00207 |
| $\nu_2(\text{CH})$ | 3027.4    | 10.8 | 0.00382 | 0.00469 | 0.00479 | 0.00477 |
| $\nu_3(\text{CH})$ | 3042.0    | 6.4  | 0.00459 | 0.00526 | 0.00680 | 0.00718 |
| $\nu_4(\text{CH})$ | 3052.6    | 5.6  | 0.00771 | 0.00738 | 0.00766 | 0.00753 |
| $\nu_5(\text{CH})$ | 3072.0    | 11.3 | 0.00032 | 0.00027 | 0.00126 | 0.00109 |

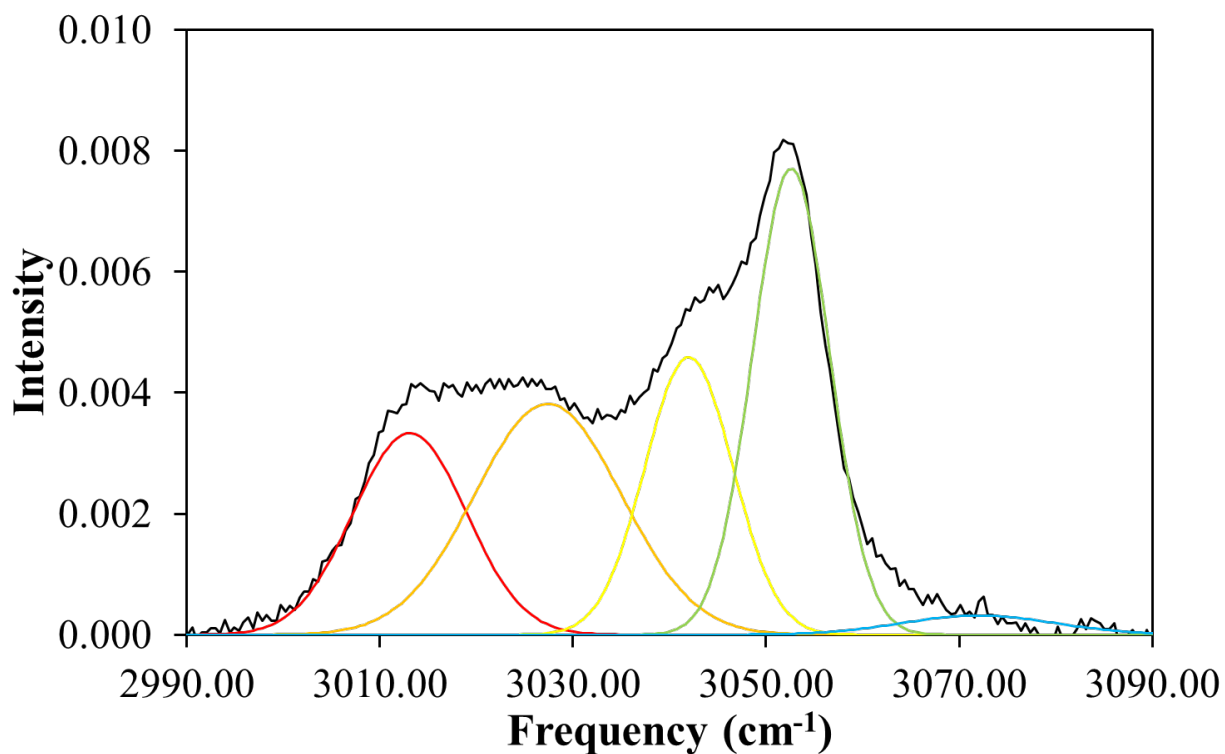

**Figure S4.** Example deconvolution of sample deposited at 28 °C fit using five Gaussians.

**Table S4.** Extremes (dark and light) of the vibrational movements for pentacene C–H modes as determined by B3LYP/6-31G (d,p). The orange arrow is the derivative of the dipole movement.

| Mode               | Frequency (cm <sup>-1</sup> ) | Frame                                                                               |
|--------------------|-------------------------------|-------------------------------------------------------------------------------------|
| $\nu_1(\text{CH})$ | 3013                          | 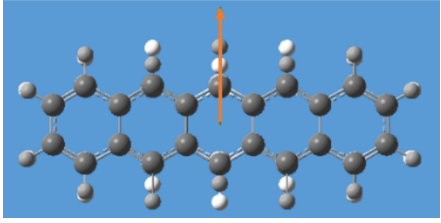   |
| $\nu_2(\text{CH})$ | 3027                          |    |
|                    |                               |   |
| $\nu_3(\text{CH})$ | 3042                          |  |
| $\nu_4(\text{CH})$ | 3053                          |  |
| $\nu_5(\text{CH})$ | 3072                          |  |

Raman spectroscopy was performed on a Witec Alpha 300R confocal Raman microscope with a UHTS300 spectrometer and DV401 CCD detector at the University of Minnesota Characterization Facility. A 785.112 nm diode laser coupled with a 600 g/mm grating was used to acquire spectra. Light was collected and focused with a Nikon 100 $\times$  objective. The spectral resolution of the instrument was *ca* 4 cm<sup>-1</sup>.

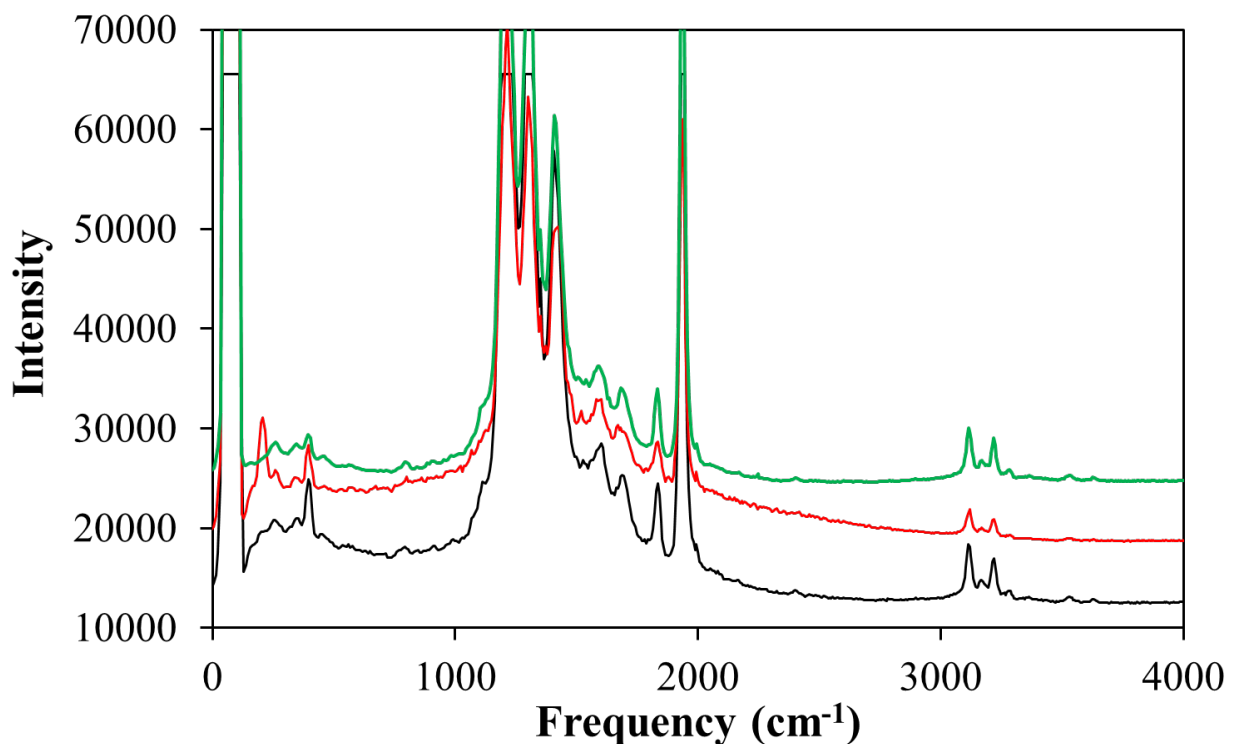

**Figure S5.** Raman spectra for pentacene deposited on CaF<sub>2</sub> windows with substrate temperatures of 28 °C (black), 125 °C (red), and 160 °C (green) during deposition.

## REFERENCES

1. Pople, J. A.; Scott, A. P.; Wong, M. W.; Radom, L., Scaling Factors for Obtaining Fundamental Vibrational Frequencies and Zero-Point Energies from HF/6-31G\* and MP2/6-31G\* Harmonic Frequencies. *Isr. J. Chem.* 1993, *33*, 345-350.
2. Wong, M. W., Vibrational Frequency Prediction Using Density Functional Theory. *Chem. Phys. Lett.* 1996, *256* (4-5), 391-399.
3. Scott, A. P.; Radom, L., Harmonic Vibrational Frequencies: An Evaluation of Hartree-Fock, Møller-Plesset, Quadratic Configuration Interaction, Density Functional Theory, and Semiempirical Scale Factors. *J. Phys. Chem.* 1996, *100*, 16502-16513.
